# Supplementary material for: Copper–silicon core–shell nanotube arrays for free-standing lithium ion battery anodes
Source: Royal Society of Chemistry journal article supplement (doi:10.1039/c4ta03188a), 2014-07-30
Supplement: c4ta03188a1.pdf [file c4ta03188a1.pdf]

## **Copper-Silicon Core-Shell Nanotube Arrays for Free-Standing Lithium-ion Battery Anodes**

Leimeng Sun, Xinghui Wang, Rahmat Agung Susantyoko and Qing Zhang\*

NOVITAS, Nanoelectronics Centre of Excellence, School of Electrical and Electronic Engineering,

Nanyang Technological University, Singapore 639798; E-mail: [eqzhang@ntu.edu.sg](mailto:eqzhang@ntu.edu.sg)

### **Experiments details**

*Silicon nanowire template preparation:* The vertically aligned silicon nanowire array was prepared using the same technique reported previously [1] with some modification. Briefly speaking, a thin layer of silver was deposited on a silicon wafer by electron beam evaporation and the wafer was then annealed in a quartz tube at 600 degree under Argon atmosphere for several minutes to form Ag particles pattern. A Ti/Au bi-layer was sequentially deposited on the Si wafer and the sacrificial Ag particles were removed by ultrasonic to obtain a catalyst mesh. Finally, the wafer was immersed into an etching solution to obtain a vertically aligned SiNW array.

*Copper-silicon core-shell nanotube arrays fabrication:* After the preparation of silicon nanowire arrays, copper was deposited using a Denton RF/DC magnetron sputtering system. Following copper deposition, the sample was immersed into KOH (1 mol/L) etchant solution at 80°C for several minutes, the copper nanotube array was delaminated from the silicon wafer. At last, amorphous silicon was deposited through a Cello plasma enhanced CVD (PECVD) system.

*Structural Characterization:* The structure and morphology of the prepared products were characterized by a Raman system (WITec) with a 532 nm wavelength laser, field-emission scanning electron microscopy (SEM, LEO 1550 Gemini) and Transmission electron microscopy (TEM, JEM 2100F JEOL), respectively.

*Electrochemical Characterization:* Electrochemical characterizations were carried out using CR-2032 coin cell, which was assembled in a high purity Ar filled glove box ( $\text{H}_2\text{O} < 0.5$  ppm,  $\text{O}_2 < 0.5$  ppm, Innovative Technology) with a pure Lithium foil as the counter and reference electrode. The electrolyte used was 1 M lithium hexafluorophosphate ( $\text{LiPF}_6$ ) dissolved in ethylene carbonate and dimethyl carbonate (EC/DMC, 1:1 by volume). The galvanostatic discharge-charge measurement and cyclic voltammetry were conducted through using a multichannel battery tester (Neware, BTS-610) and an electrochemical workstation (AUTOLAB, M 101), respectively.

### Supplementary Figure

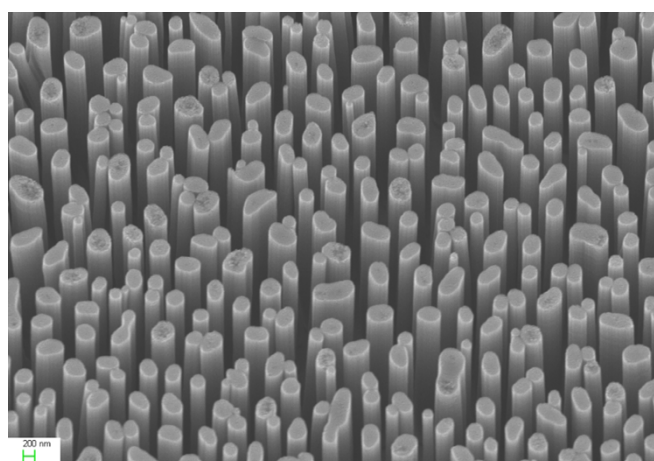

**Figure. S1** Tilted SEM image of silicon nanowire arrays template.

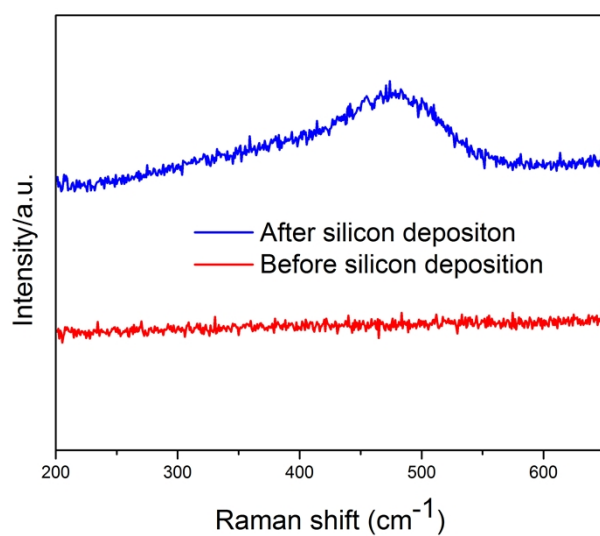

**Figure. S2** Raman spectrum of the copper nanowire arrays before and after amorphous Si coating. Before coating, there was no Raman peaks for copper within this range [2]. After amorphous silicon coating, a broad peak at  $\sim 480 \text{ cm}^{-1}$  can be detected, indicating the characteristic band of amorphous Si [3].

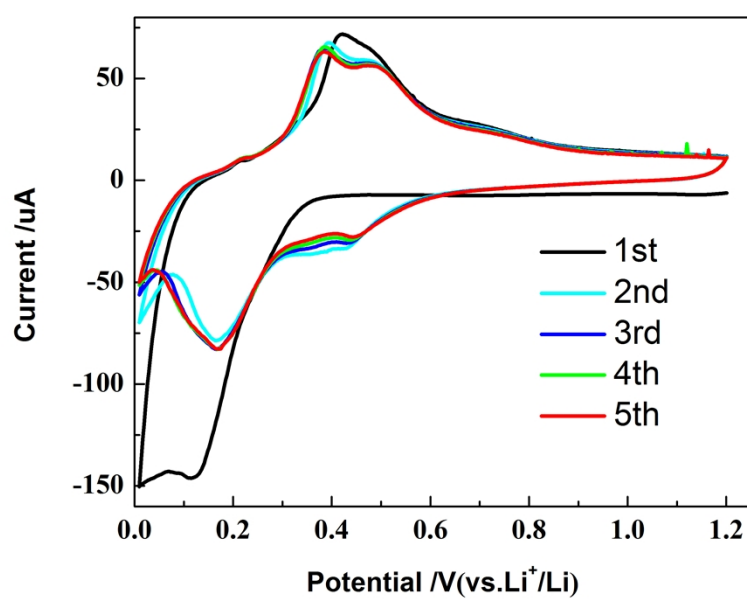

**Figure. S3** CV curves of the copper-silicon anode for the first 5 cycles which are corresponding to the results of other amorphous silicon based electrodes [4].

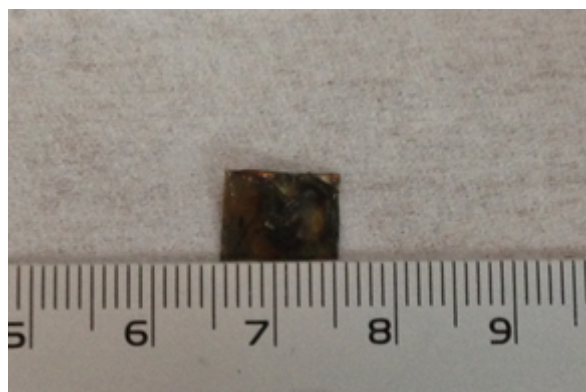

**Figure. S4** Photograph of copper nanotube array current collector.

## Reference

- 1 L. Sun, Y. Fan, X. Wang, R. A. Susantyoko and Q. Zhang, *Nanotechnology*, 2014, **25**, 255302.
- 2 R. L.Frost, P. A. Williams, W. Martens, P. Leverett and J. T. Kloprogge, *American Mineralogist*, 2004, 89, 1130-1137.
- 3 K. Evanoff, J. Benson, M. Schauer, I. Kovalenko, D. Lashmore, W. Jud Ready and G. Yushin, *ACS Nano*, 2012, 6, 9837-9845.
- 4 Y. Fan, Q. Zhang, Q. Xiao, X. Wang and K. Huang, *Carbon*, 2013, 59, 264-269.
